# Supplementary material for: Corporate Sustainability Communication as ‘Fake News’: Firms’ Greenwashing on Twitter
Source: MDPI journal article supplement (doi:10.3390/su15086683), 2023-04-14
Supplement: s1 [file s1]

Archive with 1 entries (1 files):
- sustainability-2002586-supplementary.pdf
